# Supplementary material for: Serum metabolomics strategy for investigating the hepatotoxicity induced by different exposure times and doses of Gynura segetum (Lour.) Merr. in rats based on GC-MS
Source: Royal Society of Chemistry journal article supplement (doi:10.1039/d2ra07269f), 2023-01-01
Supplement: d2ra07269f1.pdf [file d2ra07269f1.pdf]

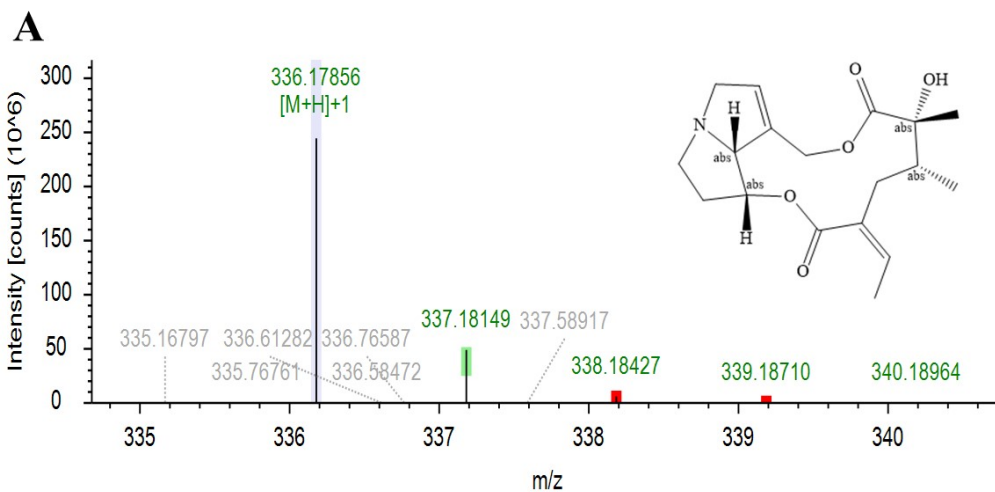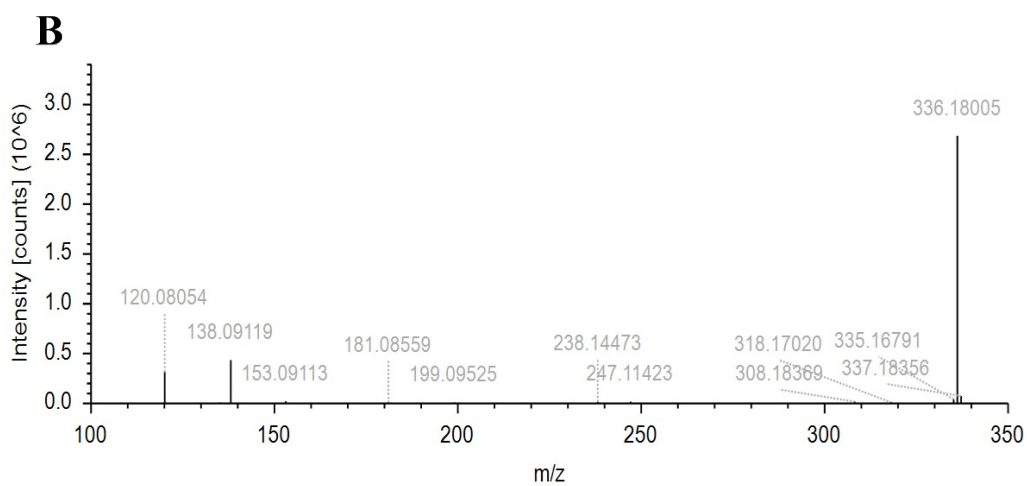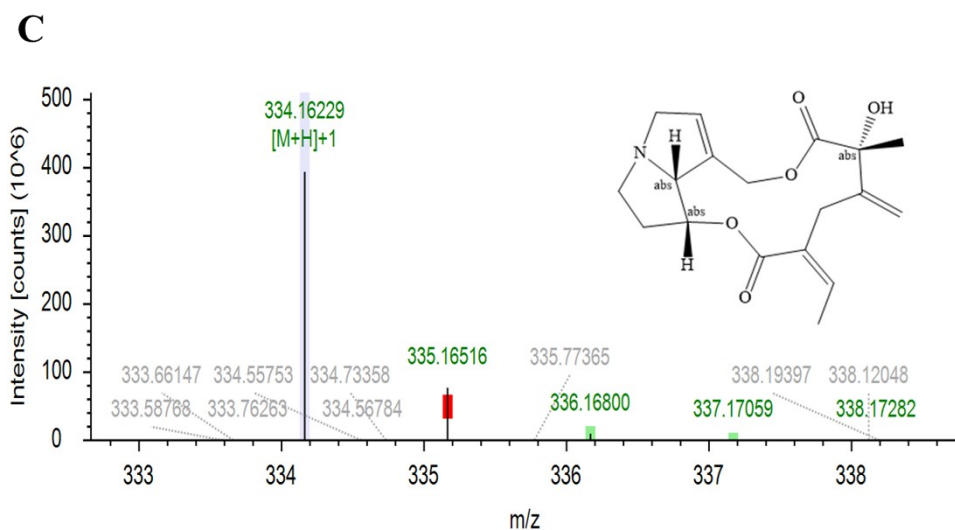

**D**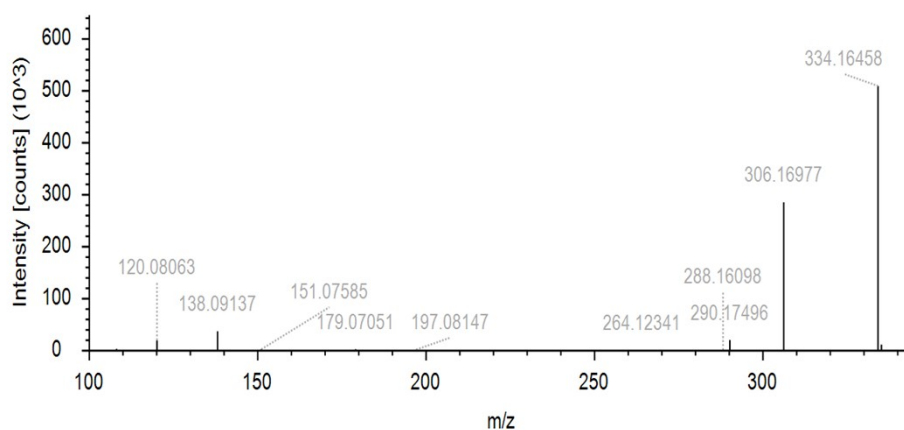**E**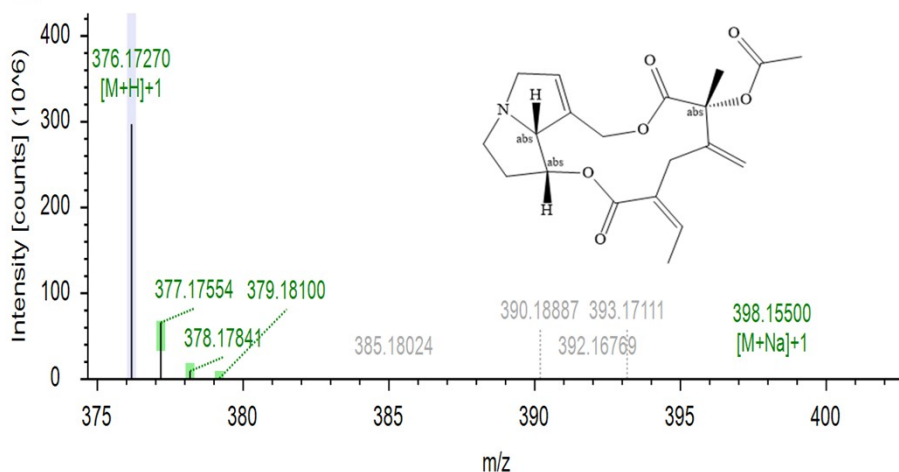**F**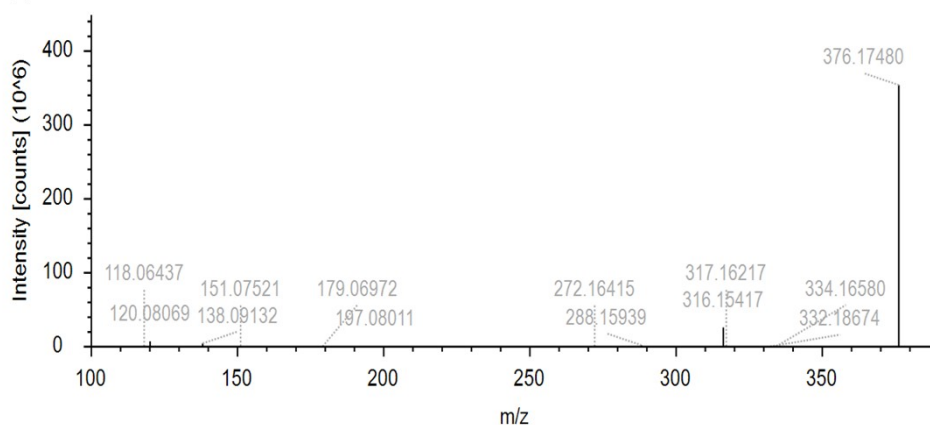

**Supplementary Figure S1 The MS and MS/MS spectral information of main toxic compounds of GS. (A-B) The MS and MS/MS data of Senecionine; (C-D) The MS and MS/MS data of Seneciphylline; (E-F) The MS and MS/MS data of Seneciphyllinine.**
